# Supplementary material for: Brain-wide screen of prelimbic cortex inputs reveals a functional shift during early fear memory consolidation
Source: eLife. 2022 Jul 15;11:e78542. doi: 10.7554/eLife.78542 (PMC9286739; doi:10.7554/eLife.78542)
Supplement: Figure 1—source data 1. [file elife-78542-fig1-data1.xlsx]

## Sheet: Figure 1
Figure 1B			Figure 1 D-F
Group	%Freezing		Group	%cFos in PL	%cFos in ACC	%cFos in IL
Encoding no shock	7		Encoding no shock	3.4888	2.11464	3.55612
	10.7			7.29705	6.69055	3.53529
	15.1			3.9258	3.73742	4.44143
	15			4.71282	4.05261	4.26303
	8.8			4.97168	3.82126	6.29673
	6.4			4.9278	3.85179	3.44935
	8.1			4.80429	3.01735	7.45356
	2.3			3.5532	1.55616	2.8501
	4.5			1.73707	0.823038	3.21742
	21.9			1.14271	0.459412	2.0742
	2.8					1.80043
	8.7		Encoding shock	6.42479	2.07676	4.56162
Encoding shock	23.5			3.72024	1.10325	4.22754
	0.7			6.83848	2.93327	4.29287
	9			7.42874	4.27593	6.58491
	7.6			8.91473	6.5259	6.43814
	15			5.87032	2.53305	4.1875
	12.4			5.71872	1.41938	3.11375
	8.6			6.72745	4.78549	5.39086
	6.6			4.82275	2.81431	2.67774
	8.1			11.3032	9.50549	6.76979
	27.7			10.9536	10.1441	7.22481
	6.3			3.81876	2.57617	3.81406
	14			1.90016	0.708269	2.18696
	5.1		Recent no shock	4.38679	3.46765	2.95741
Recent no shock	22.4			2.72039	1.50798	1.49539
	23.2			3.68484	1.97577	3.44026
	9.9			2.43883	0.901643	2.41239
	17.7			1.12315	1.39282	1.04562
	25			2.65847	1.88152	2.73315
	9.4			3.20472	2.22322	2.36803
	26.2			1.77926	0.446721	1.62584
	29			2.57142	1.11128	1.56155
	35.3			0.768929	0.548535	0.553461
	22.2			1.40095	0.973467	1.27204
	20.6			0.785528	0.855174	0.858631
Recent shock	25.2		Recent shock	3.51482	2.43159	2.24967
	87.5			2.22694	0.607635	2.11507
	55.3			1.82115	0.709725	1.09175
	74.7			2.35106	0.647302	1.34686
	51.9			3.50195	1.63411	1.42763
	91.4			5.2328	2.67087	2.18791
	89.6			6.06624	3.21302	2.71232
	84.8			2.86709	1.32603	1.34885
	67.3			1.85282	1.78061	0.871229
	29.4			1.51999	0.838749	0.628872
	57.8			1.35395	0.745341	0.344061
Remote no shock	25.3			1.76294	0.801676	1.36224
	23.5		Remote no shock	4.88413	2.60093	3.3509
	47.7			5.36522	4.86048	3.89049
	30.1			3.14549	2.02502	2.11871
	14.1			2.93693	1.72144	3.04748
	12.5			6.62971	6.59878	2.93114
	39.2			4.77243	3.3262	2.6602
	15.9			4.63314	5.13466	3.51603
	17.4			3.43052	2.84573	1.74871
	37.5			1.93449	0.776833	0.95397
	12			5.80372	3.47188	3.51766
	24.1			3.16807	2.42657	2.30135
Remote shock	74.6		Remote shock	2.27448	0.717346	1.88293
	61.7			4.14069	1.96818	2.73817
	55.4			2.02759	1.00324	1.33921
	78			1.59721	0.74832	1.40054
	54.9			3.00277	2.17913	1.5533
	82			4.36512	2.46393	3.71246
	64			3.02354	2.11965	4.13943
	82.5			3.82853	0.920437	2.40133
	83.9			3.87597	2.87897	3.20355
	76.4			5.26958	3.41071	2.44672
	72.1			2.71187	1.46384	2.85928
	71.1					2.26522
