# Supplementary material for: Brain-wide screen of prelimbic cortex inputs reveals a functional shift during early fear memory consolidation
Source: eLife. 2022 Jul 15;11:e78542. doi: 10.7554/eLife.78542 (PMC9286739; doi:10.7554/eLife.78542)
Supplement: Figure 2—source data 1. [file elife-78542-fig2-data1.xlsx]

## Sheet: Figure 2 and supplement
Figure 2E
Group	%Starter cells
Tamoxifen	0.568432
	0.43782
	0.295477
Vehicle	0.0355715
	0.0288076
Figure 2H, Figure 2 supplement 1		% mCherry
Group	#starter cells	MO	SSp	SSs	GU	VISC	AUD	VIS	ACC	PL	IL	ORB	INS	RSP	PTLp	TEa	PERI	ECT	MOB	AON	TT	DP	PIR	COA	PAA	TR	CA1	CA2-3	DG	EC	PAR	POST	PRE	SUB	ProS	HATA	CLA	EP	LA	BLA	BMA	PA	CP	ACB	FS	OT	LSX	sAMY	PAL
Tamoxifen	691	0.174332	0.0114644	0.0360232	0.0483041	0.0487029	0.105848	0.111394	2.59592	3.03618	2.41552	1.5798	0.466988	0.446787	0.218239	0.107922	0.077993	0.0933872	0.018417	0.151568	0.610181	1.90417	0.0271712	0.0128108	0.059118	0.0341448	0.638677	0.00700093	0.00747705	0.0748009	0	0.00313853	0.00342419	0.335159	0.272742	0.0894374	1.69511	0.0759889	0.112332	0.809429	0.235317	0.0758275	0.0149014	0.02855	0	0.00504149	0.110095	0.0312605	0.267931
	759	0.170608	0.00941044	0.0161852	0.0127291	0.0251251	0.0165357	0.033276	1.93872	2.14319	1.32851	0.714606	0.255519	0.337334	0.0378322	0.0202616	0.0243888	0.0308507	0.0353761	0.0555068	0.48125	0.818421	0.0677324	0.0134669	0.0164555	0.0100627	0.18035	0.00492744	0.00613229	0.021015	0	0.0301362	0	0.0426555	0.109191	0.00815594	0.281122	0.0116795	0	0.224171	0.0644284	0.0299121	0.00214421	0.0252714	0.00575275	0.0453742	0.0633893	0.0389029	0.150926
	647	0.155832	0.0103219	0.0192154	0.00394547	0.0101192	0.00906918	0.0232827	2.38331	3.89617	1.90309	0.486686	0.245796	0.251866	0.0600693	0.00988655	0.0067981	0.0125891	0	0.014909	0.216392	0.831004	0.0317401	0.0049137	0.0118897	0.0112435	0.0962699	0.00141075	0.00131994	0.0246032	0	0.0119728	0	0.0440549	0.0124452	0	0.237544	0.00580257	0.0159025	0.104345	0.0140819	0.00689441	0.00104868	0.0114193	0	0.010465	0.0083967	0.00585294	0.10588
Vehicle	43	0.00327619	0.00029425	0	0	0	0	0	0.301187	1.04682	0.778077	0.0568468	0.00866406	0.0026115	0.00148102	0	0	0	0	0.00190163	0.0349369	0.0435085	0.00200608	0	0	0	0.00321437	0	0	0.00134776	0	0	0	0.00188381	0	0	0.0325733	0.00150764	0	0.0238683	0.00278458	0	0.00027055	0.0007538	0	0	0	0.00189489	0.00568451
	38	0.0141061	0.00014697	0	0	0	0	0.0006189	0.547232	1.24413	0.446719	0.0576431	0.0108407	0.00359082	0	0	0.00675356	0	0	0.00215082	0.0377514	0.148635	0.00121914	0	0	0.00359105	0.0112689	0	0	0.00267105	0	0	0	0.00201702	0.00468955	0	0.0189825	0	0	0.0119178	0	0.00337804	0.00056321	0	0	0.00101351	0.00291225	0.00087798	0.0203133
[truncated: 7 more columns]
