# Supplementary material for: Brain-wide screen of prelimbic cortex inputs reveals a functional shift during early fear memory consolidation
Source: eLife. 2022 Jul 15;11:e78542. doi: 10.7554/eLife.78542 (PMC9286739; doi:10.7554/eLife.78542)
Supplement: Figure 3—source data 1. [file elife-78542-fig3-data1.xlsx]

## Sheet: Figure 3 and supplements
Entorhinal cortex					Retrosplenial cortex					Insular cortex					vCA1					BLA					CLA
Group	%GFP	%cFos	%GFP+cFos		Group	%GFP	%cFos	%GFP+cFos		Group	%GFP	%cFos	%GFP+cFos		Group	%GFP	%cFos	%GFP+cFos		Group	%GFP	%cFos	%GFP+cFos		Group	%GFP	%cFos	%GFP+cFos
Encoding no shock	4.27935	1.63226	0.28317		Encoding no shock	4.3952	4.39785	0.243268		Encoding no shock	1.09609	1.286	0		Encoding no shock	2.47037	6.14446	0.187391		Encoding no shock	2.08411	3.28837	0.287298		Encoding no shock	3.9181	5.02359	0.116279
	5.28274	3.1498	0.223214			2.92494	16.9475	1.01596			2.25069	2.75859	0.338284			1.41758	4.89307	0.201973			2.94061	3.5336	0.305849			2.26585	5.4358	0
	2.69849	1.39367	0			3.11025	6.37504	0.328097			2.04512	2.294	0.252061			0.966459	7.06952	0.174802			1.75348	5.31157	0.360931			3.74927	10.5857	0.979362
	3.53785	2.01657	0.110375			2.43089	4.60762	0			1.02637	3.89502	0.169696			0.657893	4.39796	0.0442087			3.70398	3.97317	0.583133			8.68616	11.3921	2.34362
	3.22961	7.07423	0.618581			4.0214	5.71592	0.289587			1.8648	0.908889	0.318225			3.3694	11.436	0.677355			6.42346	3.83393	0.775899			4.46057	12.5734	0.716347
	3.3551	1.79033	0.167742			2.84752	22.157	1.0752			3.1727	3.36997	0.557783			3.3694	11.436	0.677355			5.40077	2.4763	0.607898			6.85154	5.91787	0.924378
	1.44404	3.12072	0.160449			1.59796	4.67379	0.237817			1.54847	1.96223	0.0848176			2.52186	7.18743	0.313499			4.09699	2.8156	0.828379			2.8932	12.5898	0.946886
Encoding shock	4.4869	2.35881	0.455138			2.38619	16.8563	0.70702			1.55708	4.17248	0.102881			2.27623	11.2077	0.499761			0.585745	0.4963	0			4.47261	7.52688	1.28264
	2.38642	2.40112	0.167887			1.92608	7.12737	0.202902			2.10982	2.70065	0.13156			2.15273	11.5757	0.367549			1.59081	2.33754	0.282175			6.37541	7.73686	1.07442
	2.92667	2.99586	0.253563			4.63913	6.10979	0.427322			1.86789	1.81744	0.0528541			0.929752	4.3048	0.0258264		Encoding shock	4.29681	4.19591	0.55576			3.91435	5.67557	0.117096
	6.19938	1.5523	0.36581			2.70384	5.53746	0.437322			1.36783	1.04956	0.0534759			0.412174	2.29625	0.0387147			4.50579	4.15993	0.586781		Encoding shock	5.36516	10.3846	1.36639
	4.0631	3.62553	0.686007		Encoding shock	3.39742	8.17149	0.518553		Encoding shock	1.04948	2.12178	0.162063		Encoding shock	2.68434	5.63466	0.441943			2.79501	4.99005	0.623271			4.98031	7.11016	0.484526
	5.60788	2.84546	0.719857			4.4828	6.25484	0.434477			1.00557	1.3037	0.0706714			1.50924	4.35673	0.149246			2.03423	3.66674	0.345537			4.93822	9.88856	1.36356
	4.08169	3.906	0.892788			1.50264	5.55763	0.251656			1.83164	2.19452	0.103663			2.22763	6.58166	0.222861			3.26522	2.06724	0.340642			2.31653	10.6669	0.721864
	4.72721	2.86505	0.353839			4.31681	11.1693	0.548938			0.947223	2.49093	0.0865801			1.42903	4.84554	0.222697			4.61373	1.55638	0.414763			6.99609	5.01656	0.555723
	5.04845	4.60413	0.958746			2.44003	5.34165	0.0959551			1.61908	0.657796	0.0661813			2.53545	2.32058	0.128921			2.15958	4.07093	0.379515			7.64876	6.89371	1.23035
	3.2693	2.20765	0.273616			3.33137	8.76031	0.464483			2.2328	0.955556	0.0393391			3.59129	3.65666	0.320837			2.03222	1.53067	0.138122			8.02804	6.2105	1.11784
Recent no shock	4.53922	2.18792	1.09469			4.19463	5.45302	0.419463			1.02641	1.65692	0.0384911			3.89526	6.22033	0.455063			0.902098	2.4855	0.288091			5.04052	9.87249	0.657095
	3.21475	0.820911	0			1.8398	9.19027	0.414497			1.45754	3.47829	0.234192			2.3417	4.71042	0.192621			3.29396	1.71144	0.498191			2.59726	17.0007	0.615177
	3.11848	1.52347	0.284241			3.55089	22.8451	1.46774			1.95504	6.18098	0.232707			2.10456	8.06722	0.451004		Recent no shock	1.1426	4.25067	0.15628			3.03858	10.4565	0.604428
	4.78169	1.54741	0.241581			3.62684	14.7446	0.847285			1.04671	3.00391	0			0.636354	5.17872	0.0912916			1.64573	4.15906	0.462822			4.93836	9.468	1.2329
	5.23186	3.65555	1.1095			2.73101	9.56254	0.391376			1.44368	4.48787	0.174475			0.787717	3.62677	0.0420698			1.26111	2.04585	0.173475			4.40888	7.06574	0.411185
	4.48593	3.98831	1.15163			1.73154	9.87962	0.4123			1.93234	2.54118	0.113275		Recent no shock	0.957432	3.83294	0.0212134			4.14718	3.59766	0.952671		Recent no shock	7.49042	10.6101	2.01355
	4.92522	4.02696	0.69811		Recent no shock	5.95086	13.1577	1.67855		Recent no shock	1.00584	1.69995	0.0496524			0.840576	2.16909	0.0175316			2.86114	1.03395	0.166108			6.97124	8.35713	1.48034
	5.18017	1.56306	0.959678			5.19806	7.08577	0.73665			2.16676	1.27572	0.0851203			0.956568	2.70639	0.146958			1.58496	0.174591	0			4.71158	5.8938	0.717987
	4.71944	0.945651	0.166919			2.81925	4.76096	0.148101			1.5275	2.07426	0.199363			2.7207	2.32349	0.142337			3.88677	0.795485	0.32929			5.23715	4.97559	0.528947
	5.49288	0.517486	0			4.06248	6.84263	0.622808			1.52767	1.03707	0.0387898			2.04355	1.13976	0.0228519			2.99081	1.03836	0.183984			5.69222	4.38556	0.735853
	3.73333	0.559863	0			4.16255	2.72212	0.247151			2.34041	1.22335	0.0616143			2.34343	3.30808	0.232261			1.49998	0.562491	0.0701262			6.77848	9.37383	1.95607
Recent shock	3.69551	1.3308	0.136609			3.30559	6.59649	0.644533			2.02389	1.91931	0.0327011			3.49367	2.68354	0.303797			2.07766	1.50895	0.188302			6.99282	6.44039	1.68227
	4.54559	1.68955	0.444695			3.77477	9.21274	1.15854			0.729472	3.32845	0.190616			3.18627	3.55392	0.245098		Recent shock	3.68819	4.55014	0.538004			5.24049	2.17113	0.616529
	4.54912	0.188324	0			4.27469	6.60271	0.5713			1.01746	2.12962	0.094697			1.57776	1.57825	0.0196464			1.41859	3.83118	0.209867			3.64943	3.96721	0.317781
	5.97751	0.361512	0			3.69582	5.18503	0.301661			2.55463	2.16354	0.0538213			0.641609	0.839539	0			3.07557	2.12767	0.435885			4.57474	5.99333	0.651715
	3.82691	0.888718	0.222222			2.76513	3.6752	0.304762			2.54209	5.50019	0.363232			0.669533	1.62669	0.0639169			3.59125	4.42921	0.8581			2.38961	8.4329	0.831169
	4.90538	1.05471	0.258385			1.86189	8.84377	0.255976			0.519618	1.81613	0		Recent shock	1.31331	4.86066	0.110285			2.76342	3.06662	0.480979			3.78966	4.46883	0.380505
	6.28989	4.06609	1.4698			2.29046	2.65676	0.155207			2.25025	1.29036	0.139629			2.50189	2.88258	0.0532339			2.02491	0.894538	0.100452		Recent shock	6.14817	8.73206	1.5106
	6.53541	2.65285	1.01183		Recent shock	1.7803	7.34605	0.181958		Recent shock	1.64367	1.33135	0.170086			4.08754	2.72441	0.215649			5.109	2.74049	0.274415			5.00459	7.94632	0.652244
	4.86021	0.551942	0.0491642			5.59623	1.65221	0.278032			1.02782	1.10469	0.197427			2.81983	3.2043	0.26456			2.15395	1.896	0.196214			7.89474	6.46524	1.34828
	2.15292	0.873955	0			3.99309	1.57172	0			1.04997	1.11454	0.114855			1.48665	2.30373	0.0762003			1.67402	0.996517	0			7.61665	6.64516	0.639732
	5.39672	0.540277	0.0928505			4.72774	2.24074	0.158639			1.33838	2.05037	0.0976364			3.52082	0.478568	0.0436159			3.34008	1.25495	0			6.18093	8.24124	1.44681
	4.08842	1.47062	0.330194			3.70203	5.3023	0.776181			1.42604	0.845128	0.154022			0.620421	0.820513	0			2.52486	0.719398	0.172414			5.20535	6.34027	1.26734
	2.7305	0.600689	0			4.66171	1.23759	0.190398			3.39412	0.887483	0.132439			3.38034	4.69847	0.130086			0.685813	0.313235	0			5.7626	2.2246	0.44492
Remote no shock	3.59835	4.65083	0.533509			2.27278	9.2877	0.479123			1.87717	0.732473	0			1.40632	1.47551	0.134491			1.72628	0.415619	0.0813008			6.11732	1.80405	0.116279
	2.90055	3.56553	0.728678			4.93972	2.03476	0.397878			2.30145	0.928902	0.0448029			1.89458	3.79577	0.149917		Remote no shock	1.74024	4.94023	0.468488			4.43378	6.58311	1.00444
	3.80074	1.43089	0			4.87153	3.74826	0.64791			1.53648	0.84794	0.0438982			0.585783	3.04361	0.0188893			1.57124	5.46069	0.334139			2.48358	3.35362	0.124688
	4.52249	2.24478	0.361492			2.29541	9.84902	0.545908			1.37456	1.89326	0			0.557504	0.985618	0			3.6701	2.60512	0.30872			4.56678	6.39769	0.245397
	4.20148	4.27817	0.794461			1.16782	6.92979	0.229455			1.94613	2.24402	0			1.15669	1.09311	0.0499377			3.64135	2.56225	0.59143			4.18454	6.34376	0.919552
	3.57737	4.96373	1.2247			2.82577	1.4981	0.166322			2.35552	0.701756	0.150452		Remote no shock	3.77552	3.43231	0.249619			5.15528	3.23496	0.43252			5.39839	4.41836	0.439527
	4.55674	2.87673	0.827915			2.81709	5.04699	0.555227		Remote no shock	0.511824	2.82196	0.0503018			2.98773	3.30062	0.269727			4.19846	2.62107	0.46595		Remote no shock	4.77164	8.6202	0.616337
	2.89552	2.16653	0.170644		Remote no shock	4.11816	4.27173	0.211062			1.06866	1.60083	0.0851064			3.17353	4.38905	0.405132			2.51759	1.61601	0.428609			4.81541	11.4911	1.28617
	3.00038	2.67046	0.255916			4.73044	13.0564	1.17804			1.90915	0.697509	0			0.641839	1.40969	0.0154464			2.26154	3.50144	0.563644			4.81291	6.09378	0.305942
	2.42975	1.19981	0.260149			2.05243	10.794	0.474652			1.30237	0.855863	0.0584795			4.4183	3.32474	0.215612			2.53198	1.1339	0.226781			2.14324	6.24087	0.488599
Remote shock	3.14428	1.22011	0.0423549			2.21226	7.34976	0.19575			2.69037	1.83952	0.20667			2.98772	2.59388	0.208441			4.05323	2.77554	0.738317			5.53267	4.48882	0.883988
	3.24463	1.11907	0.081103			2.97409	3.69328	0.165232			1.87182	0.669252	0.0379651			3.0064	2.24039	0.122984			2.23433	0.959469	0.151057			4.39531	3.66354	0.290253
	3.41198	1.34402	0.0730994			3.32422	5.37462	0.528757			1.56665	0.523385	0			1.37022	3.91512	0.108135		Remote shock	3.53814	2.82846	0.345508			8.91487	3.96724	0.60248
	2.63597	1.33586	0.258787			3.2051	8.43617	0.740441			2.31911	0.623269	0			1.97324	5.18873	0.11362			3.0187	2.47844	0.107532			3.51561	6.27653	0.362672
	2.75903	11.9721	1.68631			2.9569	4.94534	0.471686			1.70932	2.47989	0.0555556			0.686527	2.39176	0.121765			3.55737	3.46066	0.311015			5.13736	9.71653	0.535714
	4.16277	2.63205	0.925611			3.20154	4.15231	0.212765			2.2864	5.22879	0.222628		Remote shock	1.44038	4.4438	0.120282			3.21413	2.03763	0.287044			3.2485	11.5316	0.940705
	4.33115	4.9884	1.38255			0.284023	12.1229	0.0492611			1.25651	1.23433	0.0536481			0.643664	4.17483	0.0388048			2.05354	1.34827	0.176197			5.47409	6.89665	0.961786
	4.23888	2.45095	0.434181			1.06644	11.9775	0.255255		Remote shock	1.3167	1.62131	0.0512295			1.20234	4.37155	0.14025			3.83401	2.39951	0.448218		Remote shock	4.04024	8.10771	0.647276
	2.78855	2.12362	0.156284			2.52632	4.95017	0.191156			0.758227	1.32411	0			1.19403	2.56131	0.0745341			4.24274	3.70559	0.511333			5.84249	8.01675	0.576923
	3.44429	2.45039	0		Remote shock	4.01289	4.30795	0.669878			0.941887	1.00374	0.0950086			1.71265	0.146483	0.0155231			3.2562	1.44775	0.116686			7.92571	4.32721	0.3783
						3.40845	6.94729	0.484983			1.35888	0.86895	0.0446828			1.44587	1.36589	0.0406009			1.1034	1.13007	0			3.27128	4.5397	0.314465
						3.01261	4.57701	0.232369			2.8144	1.02614	0.0761071			3.09991	2.24463	0.171572			2.0135	2.04408	0.136612			4.1406	5.30045	0.625663
						4.03474	2.01003	0.0703235			0.801092	1.32012	0.0417362			1.4081	1.79197	0								3.85418	2.84243	0.195091
						3.19293	3.1912	0.344113			0.981912	0.663221	0.0861326			3.24692	3.13445	0.326352								6.24319	1.73938	0.129199
						4.7953	0.505244	0.251117			1.42845	0.933331	0.032175			1.69004	5.11655	0.136849								5.1501	2.90373	0.383023
						5.80762	2.32753	0.29374			1.11216	2.25885	0.166479			0.895889	4.97039	0.0512086								4.64267	7.57377	0.418728
						4.02369	1.89266	0.228916			2.62028	2.55266	0.153084													3.57209	7.82707	0.278501
						3.7197	8.17361	0.628063			2.21457	3.82754	0.330435													3.38605	10.3794	0.369926
						2.22262	6.59297	0.159901			1.52067	5.46123	0.157843													4.56066	12.6498	0.90495
						2.38862	5.63657	0.30432
						1.20112	6.99237	0.0535906
