# Supplementary material for: Brain-wide screen of prelimbic cortex inputs reveals a functional shift during early fear memory consolidation
Source: eLife. 2022 Jul 15;11:e78542. doi: 10.7554/eLife.78542 (PMC9286739; doi:10.7554/eLife.78542)
Supplement: Figure 4—source data 1. [file elife-78542-fig4-data1.xlsx]

## Sheet: Figure 4
Figure 4G: Freezing
Encoding control	Encoding hM4Di	Recent control	Recent hM4Di	Remote control	Remote hM4Di
30.1	6.6	65.1	61.5	69.4	61.2
31.4	7.8	69.2	58.5	69.4	68.6
29.6	21.9	59.3	31.2	61.9	33.8
12.4	17.7	64.6	50.3	75.7	74.4
9	3.9	70.9	70	81.5	82.8
3.1	8.6	58.2	54.8	77.8	62.2
23.6	10.4	92.4	65.5	93	63.1
27.9	10.7	56.9	74.3	81.9	71.5
8.2	10.7	71.4	72.8	75	90.7
12.4	6	89	58.3	68.4	75.7
12.3	13.2	76.7	57.7	74.3	69.1
17.1		81.7
4.5		63.6
Figure 4H: Freezing
Encoding control	Encoding hM4Di	Recent control	Recent hM4Di	Remote control	Remote hM4Di
13.7	24.5	47.3	30.4	89.1	44
23.5	2.7	52.9	31.6	54.8	52.1
9.4	21.4	60.2	52.8	72.1	66.9
14.6	5.9	42.2	65.2	46.2	64.6
3.1	24.8	46.8	54.3	84	21.8
7.3	19.3	52.2	74.7	69.1	37.9
3.6	10.5	27.1	62.1	65.6	34
12	20.8	59.8	54.6	65.5	36.6
10.9	13.5	20.9	45.8	30.1	56.4
	16.5		79.7		57.9
Figure 4I: Freezing
Encoding control	Encoding hM4Di	Recent control	Recent hM4Di	Remote control	Remote hM4Di
7.5	5.6	61.7	46.8	43.1	34.1
4.8	10.2	34.4	57.7	49.3	33.6
4.6	3.2	35.7	78.7	48.5	27.2
2.5	3.1	66.4	37.9	67.1	11.4
4.4	5.5	54.8	51.6	44.6	52.3
3.2	4.8	80.9	53.2	74.9	89.1
7	3.8	38.7	45.3	72.6	35.8
9.4	17.4	51.2	40.9	88.4	39.5
13.6	1.5	79.5	28	38.6	22.1
6.9	1.2	37.9	46.5	57.3	49.7
17.5	6.9	29.6	66.9	38.6	44.9
1.2	7.2	51.4	55.2	61.5	47.4
10.4	7.6	27.7	65.8	54	72.9
8.9	6	41.9	56.1	63.8	36.1
Figure 4J: Freezing
Encoding control	Encoding hM4Di	Recent control	Recent hM4Di
11.7	21.2	76.1	73.7
2.7	7	68.2	39.5
13.2	6.2	75.3	70.1
12.6	6.7	63.6	81.1
3.2	8.7	44.3	70.1
24.4	4.3	86.9	58.7
4.9	7.4	46.1	53.9
8.2	13.8	89.6	30.6
	9.2		75.9
	5.3		54.1
	10		73
Figure 4K: Freezing
Encoding control	Encoding hM4Di	Recent control	Recent hM4Di
5.3	5.1	64.9	57.8
5.5	23.7	77.4	45.7
13.4	10.9	65.3	67
10.9	3.6	67.9	55.9
9.2	12.3	71.8	27.6
9.8	9.4	59.3	33.2
1.3	1.9	51.8	83.4
11.5	9.7	71.5	55.4
5.2	7.1	74.4	51.1
5.3	2.6	59.5	50.4
9.2	3.7	65.1	54.5
3.2	5.8	45.3	66.3
6.1		65.8
10.2		75.1
5.9		49.8
13.9		58.7
Figure 4L: Freezing
Encoding control	Encoding hM4Di	Remote control	Remote hM4Di
11.9	6.7	82.7	37.2
8	9.6	58.7	38.9
6.3	15.1	59.8	81.8
3.9	29.2	51.1	62
8.8	16.5	77.8	91.9
6.2	10.9	45.9	45.2
6.8	4.1	39.3	76
14.3	6.8	71.8	64.7
17.9	6.3	55.6	66.2
12.5	2.5	74.6	89.5
8.3		58.6
8.5		69
8.8		66.2
2.1		94
6.9		81.1
5.6		65.9
6.6		76.6

## Sheet: Figure 4 supplement 1
Figure 4 - S1 D: %hM4Di			Figure 4 - S1 E: %cFos			Figure 4 - S1 F: %hM4Di1cFos/chance
Vehicle	CNO		Vehicle	CNO		Vehicle	CNO
10.7417	14.1759		8.64416	9.8067		1.8222	0.949183
19.3325	8.97067		10.2725	8.55878		1.50408	0.942741
20.5651	11.206		7.46375	9.42939		1.91068	1.36001
10.2774	10.9525		7.50877	9.23894		2.14213	1.69188
9.77211	12.2386		13.3213	8.74136		1.82638	1.59797
	14.8491			10.0372			1.58016
	15.5162			8.92892			1.45174
	11.0274			11.5072			1.6505
	16.1849			9.66885			1.61073

## Sheet: Figure 4 supplement 2
Figure 4 S2 B: %Freezing
Baseline control	Baseline hM4Di	Recent control	Recent hM4Di	Remote control	Remote hM4Di
13.9	4.7	35.1	68.3	69.8	47.8
20.5	6	33.9	55.3	46.3	50.7
11.8	20.6	66.2	42.1	60.9	39.1
7.7	19.4	50.9	68	79	75.3
8.9	3.6	68.6	41	28.5	53.9
11.2	4.6	59.6	67.9	41	48
6.3	9.8	45.3	67.4	48.5	84.1
	6.5		59.7		53.6
Figure 4 S2 D-F: Open field
Group	Time in periphery (s)	Time in center (s)	Velocity (cm/s)	Distance (m)
Control	436.16	52.92	2.60638	2299.77
	588.56	22.08	2.3728	2093.85
	624.56	61.68	3.1547	2783.84
	664.96	5.8	2.76566	2426.7
	444.4	111.24	3.10794	2758.98
	412.76	66.44	2.35099	2087.02
	398.44	69.04	3.2024	2842.84
	546.72	39.04	2.8205	2503.82
hM4Di	418.24	31.52	2.63184	2340.02
	458	48.24	2.81275	2442.48
	528.32	7.24	2.35462	2048.7
	440	82.96	4.67317	4055.75
	476.32	120.56	3.43587	2914.58
	642.76	9.56	2.19834	1862.43
	662.36	21.96	1.73649	1497.9
	509.92	57.16	2.73636	2360.39

## Sheet: Figure 4 supplement 3
Figure 4 S3 B: %Freezing
Baseline control	Baseline hM4Di	Recall 1 control	Recall 1 hM4Di	Recall 2 control	Recall 2 hM4Di	Recall 3 control	Recall 3 hM4Di
6.6	4.4	70.5	37.1	62.6	22.1	27.2	17.6
16	11.6	86.1	58.9	54.4	41.8	37.5	41.5
3.6	4.1	59.3	75.2	41.3	32.5	70.2	23.6
3.9	5.7	57.2	50.1	23.9	53.9	20.6	49
7.8	18.6	78	88.7	64.7	63.2	25.1	64.9
10.7	0.9	40.2	72.3	45.7	57.5	72.8	27.7
4.3	4.2	86.6	31	57.5	73.7	87.4	77.2
7.9	0.8	67.2	78.1	56.2	78.1	63	38.1
13.8		81		46.4		57.7
