# Supplementary material for: Brain-wide screen of prelimbic cortex inputs reveals a functional shift during early fear memory consolidation
Source: eLife. 2022 Jul 15;11:e78542. doi: 10.7554/eLife.78542 (PMC9286739; doi:10.7554/eLife.78542)
Supplement: Figure 5—source data 1. [file elife-78542-fig5-data1.xlsx]

## Sheet: Figure 5
Figure 5E: %Freezing					Figure 5H: %Freezing
Encoding vehicle	Encoding CNO	Recent vehicle	Recent CNO		Encoding vehicle	Encoding CNO	Recent vehicle	Recent CNO
1.2	9.4	43.7	20		10.5	6.2	34.2	38.6
3.2	6.3	73.7	62.3		3.9	2.4	35.6	27.6
5.4	19.1	28.1	46.4		15.1	2.1	67.3	34.7
3.8	6.5	42.6	25.3		6.7	4.9	70.2	25.3
1.6	33.9	40.4	40.4		3.9	2.1	46.9	45.4
8.9	3.4	45.8	39.4		8.8		78.9
8.1	9.9	46.4	37.9		17.2		41.6
0	1.8	36	19.3		7		51
2.5	1.9	80.8	22.5		4.2		48.4
6.6	3.3	50.5	46.2
3.5	2.9	61	43.6
	11.9		44.8
Figure 5F					Figure 5I
Group	%Freezing	%GFP+cFos/GFP			Group	%Freezing	%GFP+cFos/GFP
Vehicle	43.7	63.0253			Vehicle	35.6	61.5643
	73.7	74.876				46.9	52.565
	28.1	77.5937				78.9	48.751
	42.6	72.1308				41.6	69.2886
	40.4	56.6854				51	51.8285
	45.8	65.2861				48.4	53.7388
	46.4	57.3771			CNO	38.6	60.5455
	36	62.6562				27.6	45.1731
	80.8	44.7291				34.7	57.3318
	50.5	51.9909				25.3	51.7345
	61	78.0811				45.4	70.5138
CNO	20	63.0253
	62.3	74.876
	46.4	77.5937
	25.3	63.9738
	40.4	56.8855
	39.4	70.4456
	37.9	62.0298
	19.3	46.7911
	22.5	50.7828
	46.2	63.3391
	43.6	72.2809
	44.8	72.643

## Sheet: Figure 5 supplement 1
Figure 5 S1 A: %GFP			Figure 5 S1 B: %cFos			Figure 5 S1 C: %GFP+cFos/chance			Figure 5 S1 C: %GFP+cFos/GFP
Vehicle	CNO		Vehicle	CNO		Vehicle	CNO		Vehicle	CNO
4.17316	2.95245		15.9506	11.5961		4.60275	5.45816		73.0353	63.0253
3.71597	1.33315		12.4163	13.1992		5.20837	5.67537		64.4133	74.876
1.65784	1.7499		13.7464	10.9833		5.43898	7.06078		74.4631	77.5937
3.16419	4.09459		13.1482	13.2535		5.67964	4.83627		72.1308	63.9738
3.73209	3.34186		14.8504	15.9805		4.38625	4.48183		65.2861	70.4456
3.9363	2.86813		11.1355	13.176		5.28664	4.71933		57.3771	62.0298
2.71031	1.25378		14.7687	13.2099		4.63439	4.29747		68.1489	56.8855
1.97642	1.84365		14.1846	7.8343		4.00578	6.56046		56.6854	46.7911
3.8716	1.69944		10.453	5.78464		6.03855	9.00519		62.6562	50.7828
2.23347	3.70173		6.6806	11.2213		6.72908	5.75678		44.7291	63.3391
1.55243	2.01411		9.49059	9.72221		5.3431	7.46561		51.9909	72.2809
1.19751	1.79174		11.1017	11.3148		7.08406	6.45578		78.0811	72.643
Figure 5 S1 E: %GFP			Figure 5 S1 F: %cFos			Figure 5 S1 G: %GFP+cFos/chance			Figure 5 S1 H: %GFP+cFos/GFP
Vehicle	CNO		Vehicle	CNO		Vehicle	CNO		Vehicle	CNO
3.18978	3.59823		11.9951	11.0719		4.45403	5.5576		52.565	60.5455
2.65955	2.0992		10.1205	8.49927		4.82165	5.34207		48.751	45.1731
3.76451	3.31653		17.082	13.7119		4.13119	4.16753		69.2886	57.3318
3.30098	1.9587		13.5548	11.8639		3.84395	4.32643		51.8285	51.7345
2.00278	3.54615		10.9794	17.5301		5.75449	4.0275		61.5643	70.5138
2.07915			10.756			5.00282			53.7388

## Sheet: Figure 5 supplement 2
Figure 5 S2 B: %Freezing					Figure 5 S2 C				Figure 5 S2 D: %GFP			Figure 5 S2 E: %cFos			Figure 5 S2 F: %GFP+cFos/chance			Figure 5 S2 G: %GFP+cFos/GFP
Encoding vehicle	Encoding CNO	Remote vehicle	Remote CNO		Group	%Freezing	%GFP+cFos/GFP		Vehicle	CNO		Vehicle	CNO		Vehicle	CNO		Vehicle	CNO
4.9	2.2	72.2	66.8		Vehicle	72.2	33.059		12.4526	9.20586		13.1863	10.1254		2.50006	3.09881		33.059	31.2502
5.4	8	71.7	64.3			71.7	34.7969		10.8124	10.1995		13.5225	13.0788		2.59343	2.40046		34.7969	31.073
4.5	1.9	34.4	63.9			34.4	40.5551		11.7671	11.6214		17.1657	14.9363		2.36282	2.40262		40.5551	35.8349
4.6	0.6	53.6	36.4			53.6	25.1827		14.2239	12.8614		11.0893	12.3162		2.29518	2.25347		25.1827	27.7432
4.1	3.7	77.4	78.2			77.4	28.7762		13.1966	8.35418		10.6587	13.2397		2.70123	3.30416		28.7762	43.3905
	2.1		87.3		CNO	66.8	31.2502			13.098			9.54893			2.68899			25.6089
						64.3	31.073
						63.9	35.8349
						36.4	27.7432
						78.2	43.3905
						87.3	25.6089

## Sheet: Figure 5 supplement 3
Figure 5 S3 B: %Freezing						Figure 5 S3 C
Encoding vehicle	Encoding CNO	Remote vehicle	Remote CNO			Group	%Freezing	%GFP+cFos/GFP
1.2	3.3	26.5	35.8			Vehicle	26.5	78.3015
1.5	1.3	24.3	25.9				24.3	62.7256
0.9	1.9	37.9	29.4				37.9	60.6494
9.9	0.9	22.9	38.5				22.9	69.8169
4	2.7	36.3	20				36.3	70.545
3.5	9.1	50.5	25.6				50.5	76.8275
7.7	1.9	26.2	48.5				26.2	58.7149
						CNO	35.8	57.8065
							25.9	58.6426
							29.4	67.1583
							38.5	63.597
							20	68.7395
							25.6	68.6759
							48.5	73.3131
